# Supplementary material for: A general approach towards multi-faceted hollow oxide composites using zeolitic imidazolate frameworks
Source: Royal Society of Chemistry journal article supplement (doi:10.1039/c4nr05135a), 2014-11-10
Supplement: c4nr05135a1.pdf [file c4nr05135a1.pdf]

## Supporting Information

### **A general approach towards multi-faceted hollow oxide composites using zeolitic imidazolate frameworks**

Renbing Wu,<sup>†a</sup> Dan Ping Wang,<sup>†bc</sup> Jianyu Han,<sup>d</sup> Hai Liu,<sup>c</sup> Kun Zhou,<sup>\*a</sup> Yizhong Huang,<sup>c</sup> Rong Xu,<sup>d</sup>  
Jun Wei,<sup>e</sup> Xiaodong Chen,<sup>c</sup> and Zhong Chen<sup>\*bc</sup>

<sup>a</sup> *School of Mechanical and Aerospace Engineering, Nanyang Technological University, Singapore 639798, Singapore*

<sup>b</sup> *Energy Research Institute, Nanyang Technological University, 1 CleanTech Loop, Singapore 6371412, Singapore*

<sup>c</sup> *School of Materials Science and Engineering, Nanyang Technological University, Singapore 639798, Singapore*

<sup>d</sup> *School of Chemical and Biomedical Engineering, Nanyang Technological University, 70 Nanyang Drive, Singapore 637457, Singapore*

<sup>e</sup> *Singapore Institute of Manufacturing Technology, Singapore 638075, Singapore*

S1

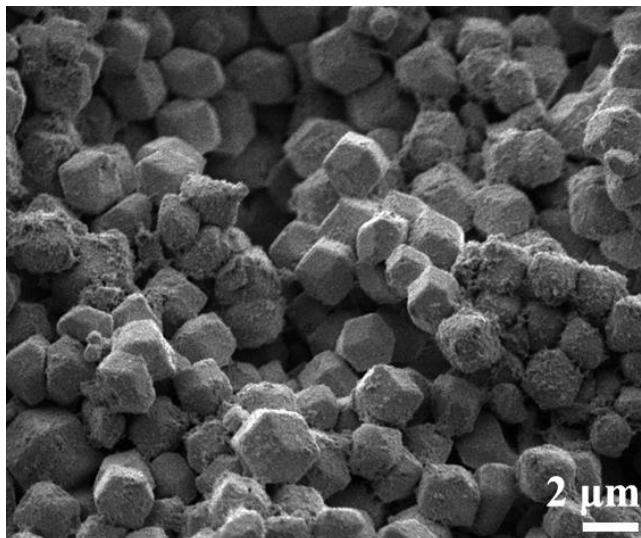

**Fig. S1** An FESEM image of XRD patterns of  $\text{Co}_3\text{O}_4/\text{SiO}_2$  hollow dodecahedra.

S2

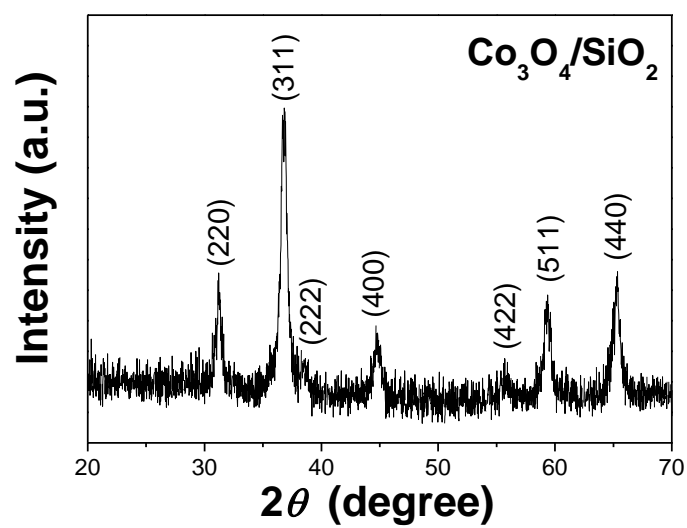

Fig. S2 XRD patterns of Co<sub>3</sub>O<sub>4</sub>/SiO<sub>2</sub> hollow dodecahedra.

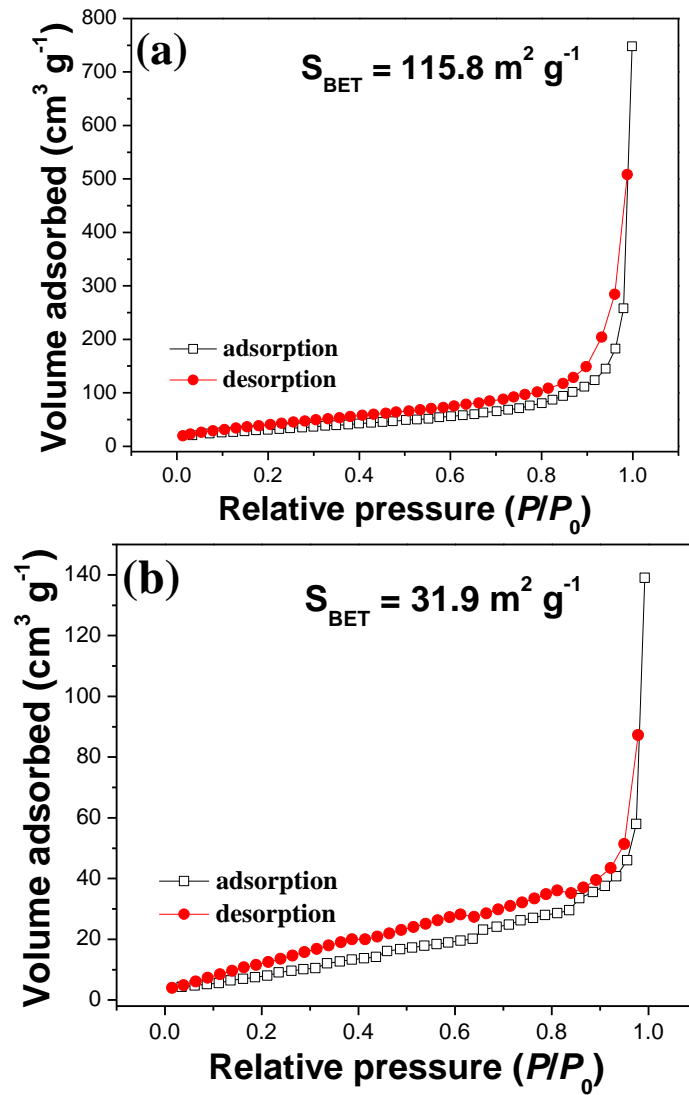

**Fig. S3** Nitrogen adsorption-desorption isotherms of (a)  $\text{Co}_3\text{O}_4/\text{SiO}_2$ -100 hollow dodecahedra and (b)  $\text{Co}_3\text{O}_4$  nanostructures

S4

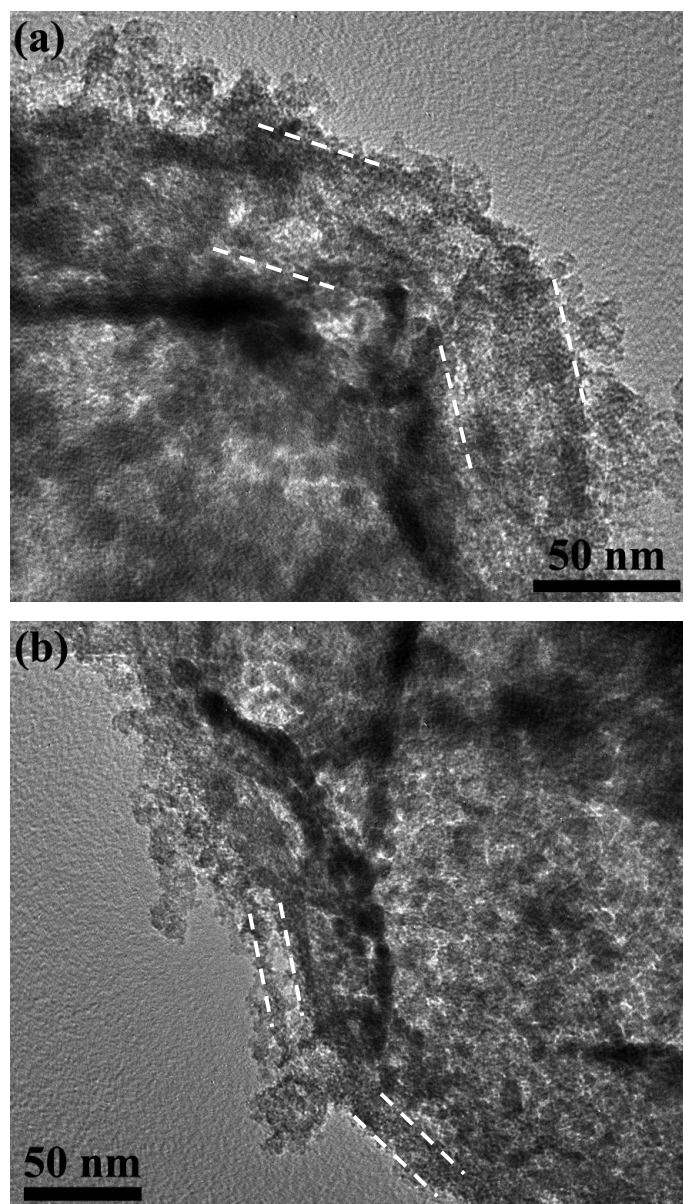

**Fig. S4** TEM images of the  $\text{Co}_3\text{O}_4/\text{SiO}_2$  hollow dodecahedra with different  $\text{SiO}_2$  shell thicknesses obtained by adding different amounts of TEOS in the sol-gel process: (a) 60  $\mu\text{L}$  and (b) 30  $\mu\text{L}$ .

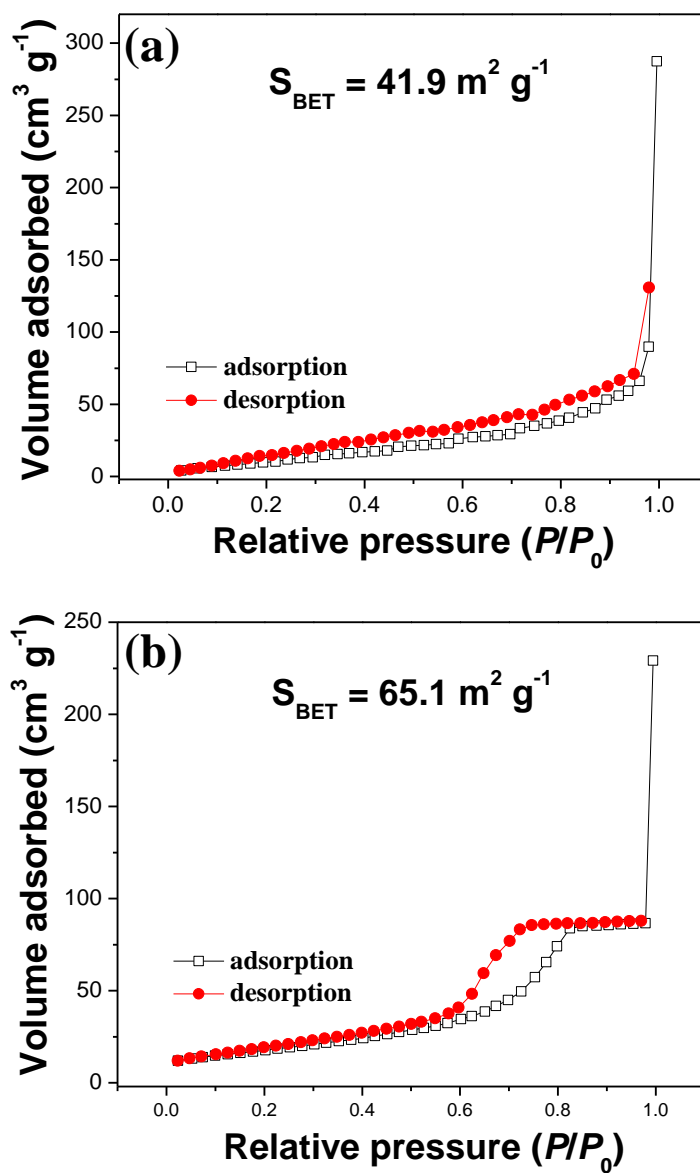

**Fig. S5** Nitrogen adsorption-desorption isotherm curves of (a)  $\text{Co}_3\text{O}_4/\text{TiO}_2$  hollow dodecahedra and (b)  $\text{TiO}_2$ .

S6

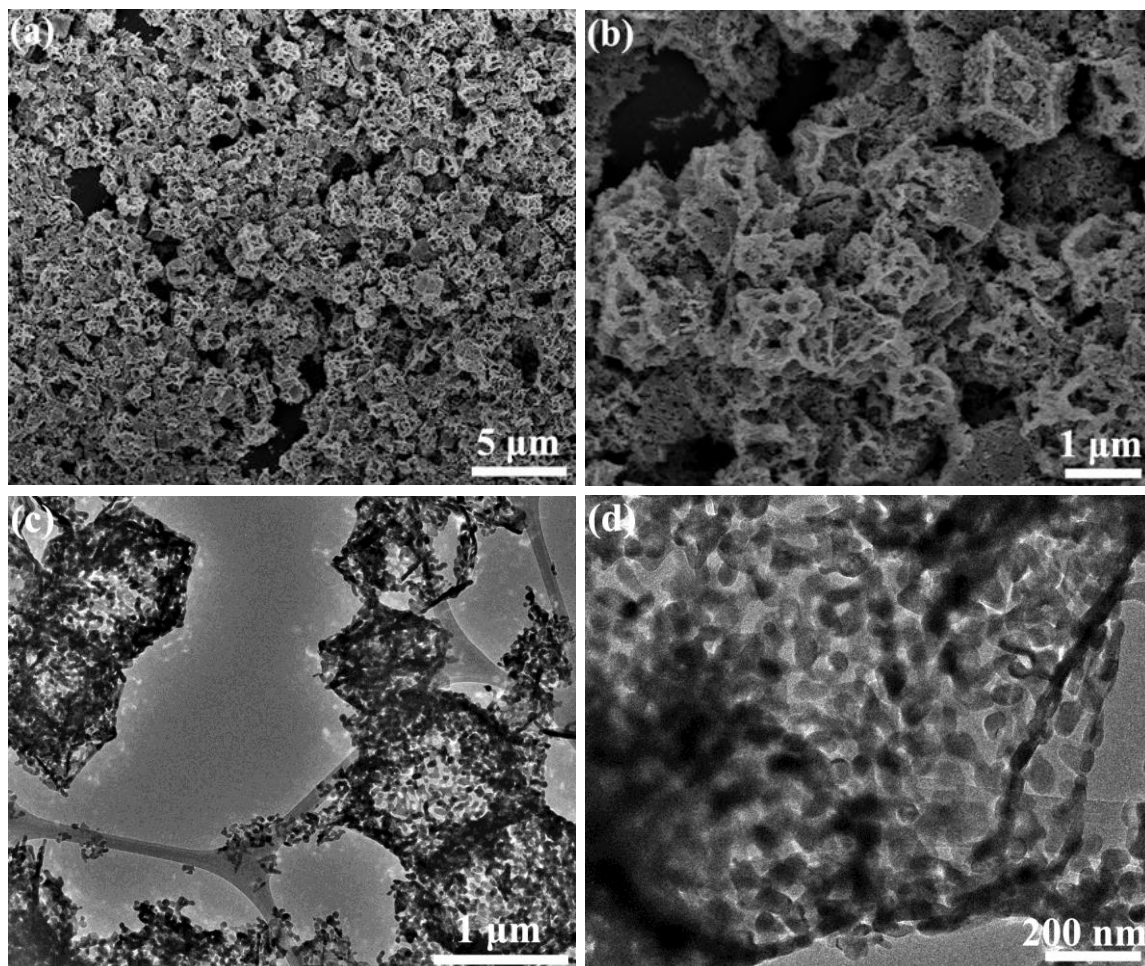

**Fig. S6** (a) Low- and (b) high-magnified FESEM images, and (c) low- and (d) high-magnified TEM images of  $\text{Co}_3\text{O}_4$  nanostructures obtained by directly heating bare ZIF-67 templates.

S7

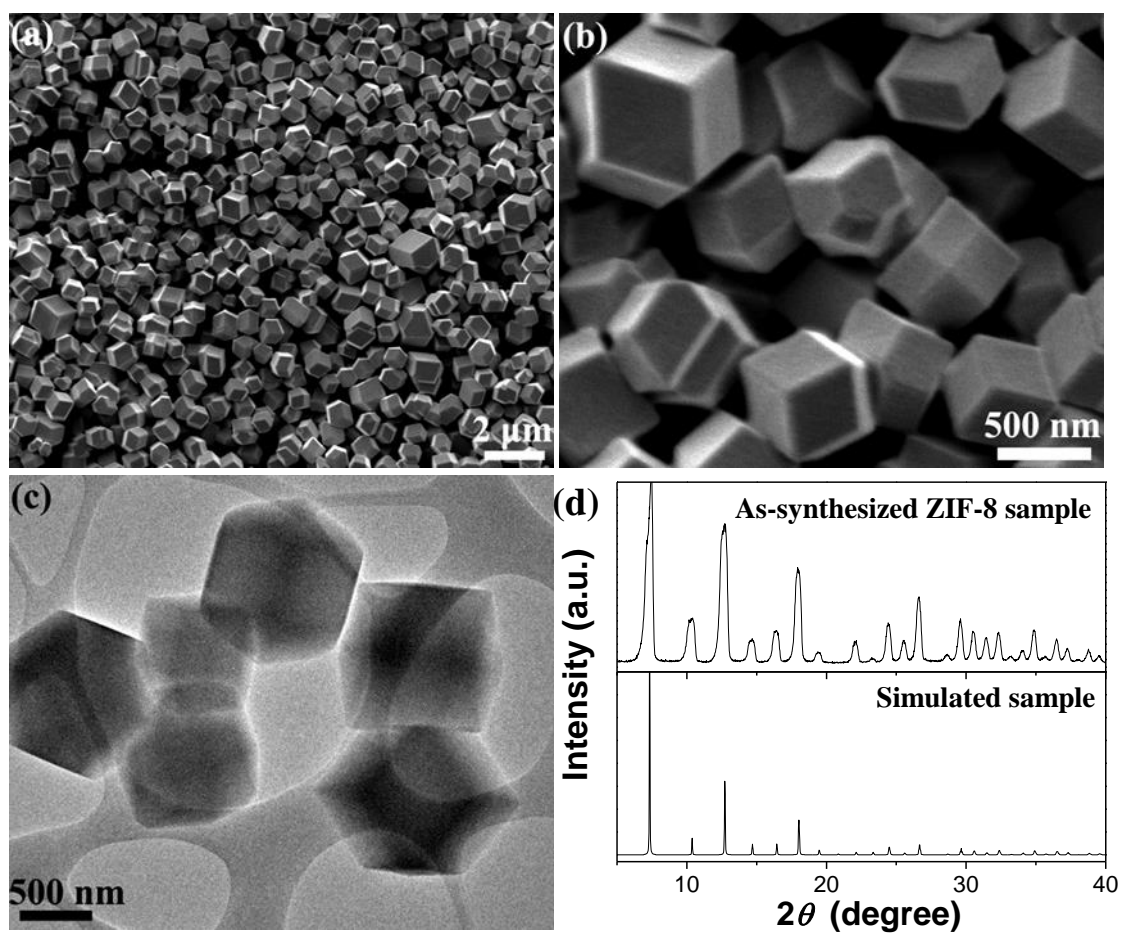

**Fig. S7** (a) Low- and (b) high-magnified FESEM images, and (c) TEM image of ZIF-8; (d) experimental and simulated XRD patterns of ZIF-8.



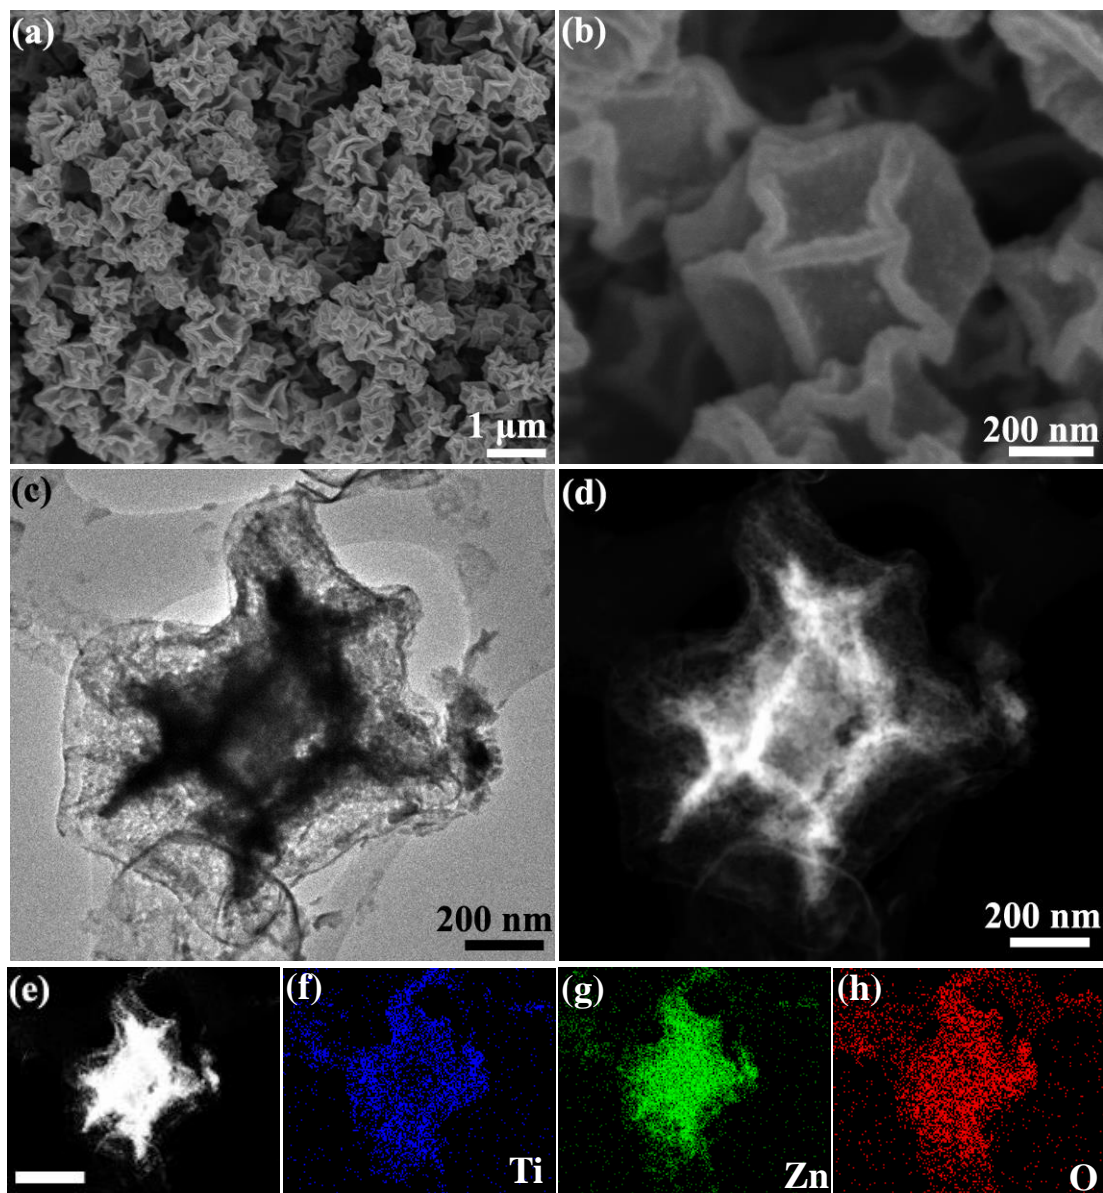

**Fig. S8.** (a) Low- and (b) high-magnified FESEM images of ZnO/TiO<sub>2</sub> hollow dodecahedra, (c) TEM image and (d) HAADF-STEM image of a single ZnO/TiO<sub>2</sub> hollow dodecahedron, (e)-(h) EDX-elemental mapping images of a single ZnO/TiO<sub>2</sub> hollow dodecahedron, the scar bar in (e) is 500 nm.

## S9

Turnover frequency was calculated based on the total Co species added into reactor, assuming all the Co atoms present evolved in the photocatalytic reaction.<sup>1-4</sup>

Turnover frequency calculation as follows:

$$\text{Turnover frequency} = \frac{\text{Produced oxygen in first 10 mins (mol/s)}}{\text{Active sites number (mol)}}$$
$$\text{Active sites number (mol)} = 3 \times \frac{m_{\text{Co}_3\text{O}_4}}{M_{\text{Co}_3\text{O}_4}}$$

**Table S1.** Turnover frequencies for all catalyst

| Catalyst                                          | Co <sub>3</sub> O <sub>4</sub><br>(wt.%) | O <sub>2</sub> yield as in 1 <sup>st</sup><br>10 mins (μmol) | Turn frequencies (s <sup>-1</sup> per<br>Co atom) × 10 <sup>4</sup> |
|---------------------------------------------------|------------------------------------------|--------------------------------------------------------------|---------------------------------------------------------------------|
| Co <sub>3</sub> O <sub>4</sub>                    | 100                                      | 17.7 ± 1.5                                                   | 2.4                                                                 |
| Co <sub>3</sub> O <sub>4</sub> + SiO <sub>2</sub> | 70.3                                     | 14.4 ± 2.0                                                   | 2.8                                                                 |
| Co <sub>3</sub> O <sub>4</sub> -30                | 80.7                                     | 19.1 ± 2.3                                                   | 3.2                                                                 |
| Co <sub>3</sub> O <sub>4</sub> -60                | 70.3                                     | 48.3 ± 2.6                                                   | 9.2                                                                 |
| Co <sub>3</sub> O <sub>4</sub> -100               | 63.8                                     | 34.6 ± 1.4                                                   | 7.3                                                                 |

## References

- [1] J. Feng; F. Heinz, *Angew. Chem. Int. Ed.* **2009**, 48, 1841.
- [2] Y. Surendranath, M. W. Kanan, D. G. Nocera, *J. Am. Chem. Soc.* **2010**, 132, 16501.
- [3] R. Jonathan, S. H. Gregory, J. Feng, *J. Am. Chem. Soc.* **2013**, 135, 4516.
- [4] R. Zheng, G. Yanbing, Z. H. Zhang, C. H. Liang, P. Gao. *J. Mater. Chem. A*, **2013**, 1, 9897.
